# Supplementary material for: Chromosome-level genome assembly of the greenfin horse-faced filefish (Thamnaconus septentrionalis) using Oxford Nanopore PromethION sequencing and Hi-C technology
Source: bioRxiv or medRxiv preprint supplement (doi:10.1101/798744), 2019-10-09
Supplement: Supplementary file [file media-1.pdf]

**Chromosome-level genome assembly of the greenfin horse-faced filefish (*Thamnaconus septentrionalis*) using Oxford Nanopore PromethION sequencing and Hi-C technology**

Li Bian<sup>1,2†</sup>, Fenghui Li<sup>1,3†</sup>, Jianlong Ge<sup>1,2†</sup>, Pengfei Wang<sup>4,5</sup>, Qing Chang<sup>1,2</sup>, Shengnong Zhang<sup>1,2</sup>, Jie Li<sup>1,2</sup>, Changlin Liu<sup>1,2</sup>, Kun Liu<sup>6</sup>, Xintian Liu<sup>7</sup>, Xuming Li<sup>8</sup>, Hongju Chen<sup>8</sup>, Siqing Chen<sup>1,2\*</sup>, Changwei Shao<sup>1,2\*</sup>, Zhishu Lin<sup>9\*</sup>

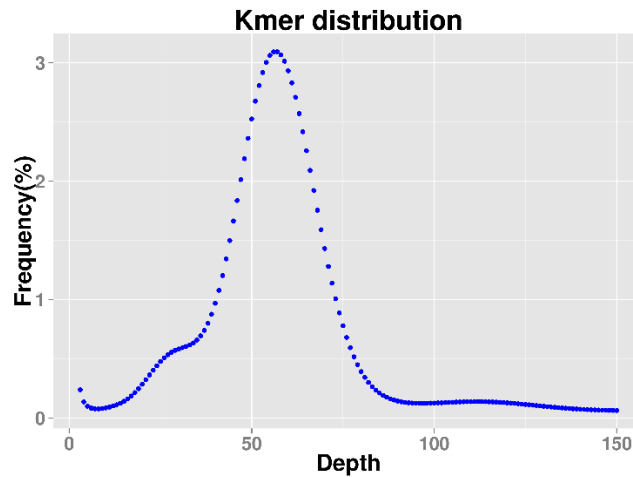

**FIGURE S1 Distribution of k-mers of length 19 from the Illumina data**

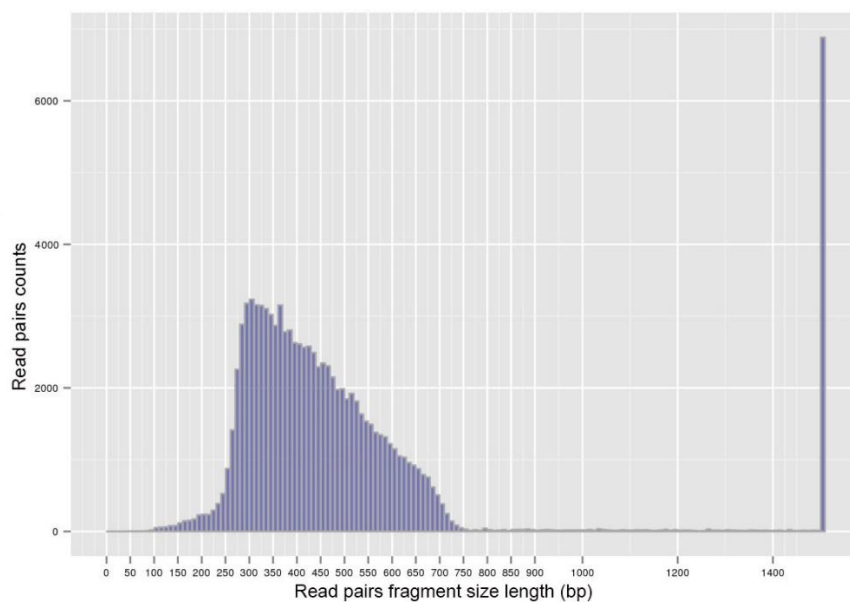

**FIGURE S2 The length distribution of the insert fragments**

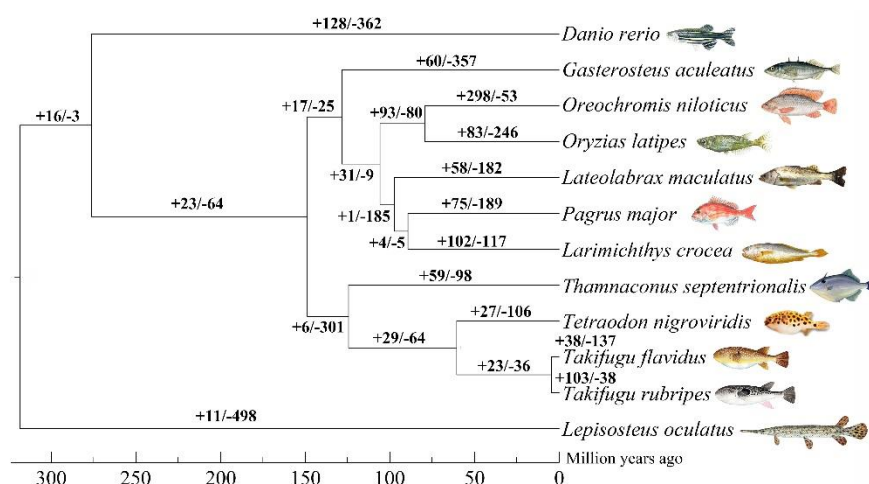

**FIGURE S3** Phylogenetic relationship of the filefish and other teleost species. The number of expanded gene families (positive values) and number of contracted gene families (negative values) were labeled at each branch.

**TABLE S1** The Nanopore subreads used for genome assembly

| Number    | Total length (bp) | N50 length (bp) | Average length (bp) |
|-----------|-------------------|-----------------|---------------------|
| 3,325,617 | 50,951,959,068    | 20,946          | 15,321              |

**TABLE S2** Size distribution of the Nanopore subreads

| Length (bp) | Number    | Total length (bp) | Average length (bp) |
|-------------|-----------|-------------------|---------------------|
| 5000~10000  | 1,681,760 | 11,742,329,829    | 6,982               |
| 10000~20000 | 926,472   | 12,866,908,175    | 13,888              |
| 20000~30000 | 327,016   | 7,998,097,285     | 24,458              |
| 30000~40000 | 177,722   | 6,126,543,930     | 34,473              |
| 40000~50000 | 93,774    | 4,172,932,320     | 44,500              |
| 50000~60000 | 51,713    | 2,819,834,600     | 54,529              |
| 60000~70000 | 28,678    | 1,851,327,652     | 64,556              |
| 70000~80000 | 16,513    | 1,230,644,062     | 74,526              |
| 80000~      | 21,969    | 2,143,341,215     | 97,562              |
| Total       | 3,325,617 | 50,951,959,068    | 15,321              |

**TABLE S3** Statistics of the filefish assembly before Hi-C correction

| Contig number | Contig length (bp) | Contig N50 (bp) | Contig N90 (bp) | Contig max (bp) | GC content (%) | Gap total length (bp) |
|---------------|--------------------|-----------------|-----------------|-----------------|----------------|-----------------------|
| 233           | 465,933,797        | 22,068,396      | 14,714,403      | 31,748,062      | 45.54          | 0                     |

**TABLE S4** The alignment of the Hi-C clean data to the genome assembly

| Mapping Type             | Number      | Ratio (%) |
|--------------------------|-------------|-----------|
| Total Read Pairs         | 90,000,000  | 100       |
| Mapped Reads             | 161,607,721 | 89.78     |
| Unique Mapped Read Pairs | 70,364,370  | 78.18     |

**TABLE S5 Statistics of different types of read pairs produced by Hi-C sequencing**

| Type                     | Number     | Ratio (%) |
|--------------------------|------------|-----------|
| Unique paired alignments | 70,364,370 | 100       |
| Valid interaction pairs  | 47,111,219 | 66.95     |
| Dangling end pairs       | 11,804,913 | 16.78     |
| Re-ligation pairs        | 4,956,284  | 7.04      |
| Self-cycle pairs         | 484,581    | 0.69      |
| Dumped pairs             | 6,007,373  | 8.54      |

**TABLE S6 Statistics of the Hi-C assembly of the filefish genome**

| Statistical level   | Scaffold    | Contig      |
|---------------------|-------------|-------------|
| Total number        | 155         | 242         |
| Total length (bp)   | 474,309,635 | 474,300,935 |
| N50 Length (bp)     | 23,049,015  | 22,457,894  |
| N90 Length (bp)     | 17,560,257  | 14,961,343  |
| Maximum length (bp) | 34,805,668  | 32,321,032  |

**TABLE S7 The alignment of the Illumina reads to the filefish genome assembly**

| Total reads | Mapped reads | Mapped (%) |
|-------------|--------------|------------|
| 306,820,704 | 298,862,082  | 97.41      |

**TABLE S8 CEGMA assessment of the filefish genome assembly**

| Number of 458 CEGs present in assembly | Percentage of 458 CEGs present in assembly (%) | Number of 248 highly conserved CEGs present in assembly | Percentage of 248 highly conserved CEGs present in assembly (%) |
|----------------------------------------|------------------------------------------------|---------------------------------------------------------|-----------------------------------------------------------------|
| 442                                    | 96.51                                          | 226                                                     | 91.13                                                           |

**TABLE S9 BUSCO assessment of the filefish genome assembly**

| Complete BUSCOs | Complete single-copy BUSCOs | Complete duplicated BUSCOs | Fragmented BUSCOs | Missing BUSCOs |
|-----------------|-----------------------------|----------------------------|-------------------|----------------|
| 4,324 (94.33%)  | 4,213 (91.91%)              | 111 (2.42%)                | 62 (1.35%)        | 198 (4.32%)    |

**TABLE S10 Statistics of the repeat sequences in the filefish genome**

| Type             | Number | Length (bp) | Percentage (%) |
|------------------|--------|-------------|----------------|
| ClassI/DIRS      | 2,483  | 263,934     | 0.06           |
| ClassI/LINE      | 81,085 | 11,388,389  | 2.40           |
| ClassI/LTR       | 43,384 | 4,826,403   | 1.02           |
| ClassI/LTR/Copia | 1,282  | 192,552     | 0.04           |
| ClassI/LTR/Gypsy | 28,575 | 3,741,163   | 0.79           |
| ClassI/PLE LARD  | 52,693 | 7,838,084   | 1.65           |
| ClassI/SINE      | 5,584  | 857,903     | 0.18           |
| ClassI/SINE TRIM | 180    | 32,195      | 0.01           |

|                   |         |            |       |
|-------------------|---------|------------|-------|
| ClassI/TRIM       | 6,007   | 3,084,453  | 0.65  |
| ClassI/Unknown    | 2,955   | 248,514    | 0.05  |
| ClassII/Crypton   | 1,622   | 137,731    | 0.03  |
| ClassII/Helitron  | 12,313  | 940,637    | 0.20  |
| ClassII/MITE      | 25,140  | 5,195,286  | 1.10  |
| ClassII/Maverick  | 11,144  | 808,998    | 0.17  |
| ClassII/TIR       | 190,397 | 20,616,935 | 4.35  |
| ClassII/Unknown   | 83,453  | 6,686,885  | 1.41  |
| PotentialHostGene | 3,758   | 485,772    | 0.10  |
| Total             | 552,055 | 67,345,834 | 14.21 |

**TABLE S11 Statistics of the non-coding RNA in the filefish genome**

| RNA classification | Number | Family |
|--------------------|--------|--------|
| tRNA               | 1,703  | 25     |
| rRNA               | 649    | 4      |
| miRNA              | 109    | 21     |

**TABLE S12 Statistics of the gene families of the twelve teleost species**

| Species                   | Number of total genes | Number of one copy genes | Number of multi-copy genes | Number of unigene | Number of other genes | Number of clustered genes | Number of unclustered genes | Number of total gene families | Number of unique gene families |
|---------------------------|-----------------------|--------------------------|----------------------------|-------------------|-----------------------|---------------------------|-----------------------------|-------------------------------|--------------------------------|
| <i>T. septentrionalis</i> | 22,067                | 3,818                    | 5,720                      | 193               | 10,530                | 20,261                    | 1,806                       | 15,433                        | 67                             |
| <i>T. flavidus</i>        | 20,707                | 3,526                    | 6,849                      | 73                | 8,663                 | 19,111                    | 1,596                       | 13,345                        | 36                             |
| <i>T. rubripes</i>        | 20,996                | 3,707                    | 6,083                      | 166               | 10,149                | 20,105                    | 891                         | 15,021                        | 50                             |
| <i>T. nigroviridis</i>    | 27,918                | 3,722                    | 6,039                      | 672               | 9,138                 | 19,571                    | 8,347                       | 14,296                        | 255                            |
| <i>D. rerio</i>           | 32,258                | 2,917                    | 9,412                      | 4,091             | 14,026                | 30,446                    | 1,812                       | 15,572                        | 741                            |
| <i>P. major</i>           | 28,343                | 3,959                    | 4,906                      | 1,570             | 9,593                 | 20,028                    | 8,315                       | 14,489                        | 508                            |
| <i>O. latipes</i>         | 22,039                | 3,745                    | 5,940                      | 728               | 11,083                | 21,496                    | 543                         | 15,470                        | 146                            |
| <i>L. crocea</i>          | 23,283                | 3,583                    | 6,491                      | 325               | 12,166                | 22,565                    | 718                         | 16,577                        | 99                             |
| <i>G. aculeatus</i>       | 20,770                | 3,755                    | 5,819                      | 476               | 9,471                 | 19,521                    | 1,249                       | 14,187                        | 57                             |
| <i>O. niloticus</i>       | 29,504                | 3,573                    | 6,789                      | 3,167             | 14,743                | 28,272                    | 1,232                       | 16,849                        | 471                            |
| <i>L. maculatus</i>       | 21,622                | 4,070                    | 4,648                      | 682               | 9,089                 | 18,489                    | 3,133                       | 13,935                        | 237                            |
| <i>L. oculatus</i>        | 18,717                | 4,369                    | 3,643                      | 613               | 8,251                 | 16,876                    | 1,841                       | 13,568                        | 156                            |
